# Supplementary material for: Association of a Multisite Interprofessional Education Initiative With Quality of Primary Care
Source: PubMed Central journal article supplement (PMC6902823; doi:10.1001/jamanetworkopen.2019.15943), 2019-11-20
Supplement: jamanetwopen-2-e1915943-s001.pdf [file jamanetwopen-2-e1915943-s001.pdf]

## Supplementary Online Content

Edwards ST, Hooker ER, Brienza R, et al. Association of a multisite interprofessional education initiative with quality of primary care. *JAMA Netw Open*. 2019;2(11):e1915943. doi:10.1001/jamanetworkopen.2019.15943

**eMethods.** Margin Calculations

**eTable 1.** Parallel Trends Tests for Main Analysis

**eTable 2.** Results from Difference-in-Differences Analysis of Outcomes Without Parallel Trends in the Preintervention Period, External Trainee Comparison Group

**eTable 3.** Sensitivity Analysis 1, Changes in Quality of Care Measures Among Patients of CoEPCE Resident Clinicians and Patients of Attending Clinicians at CoEPCE Sites Before and After Initiative Launch

**eTable 4.** Sensitivity Analysis 2, Quality of Care Measures Among Patients of CoEPCE Clinician Trainees and Patients of Non-CoEPCE Resident Clinicians at CoEPCE Sites After Initiative Launch (July 2011) at 3 CoEPCE Sites

This supplementary material has been provided by the authors to give readers additional information about their work.

**eMethods.** Margin Calculations

We used Stata's margins command to obtain predicted probabilities in order to make our results more tangible than model coefficients to readers. Predicted probabilities are also referred to as margins, predictive margins, or adjusted predictions. We can obtain the predicted probability of an outcome in each of four groups (CoEPCE vs. non-CoEPCE; pre- vs. post-periods), given each patient's actual observed values for their covariates. These probabilities are averaged to give us the predicted probabilities for each group (Table 2).

Average marginal effects allow us to show how the adjusted predictions for the pre-period differ from the adjusted predictions at the post-period, by group. Using Stata's margins dydx option, we compared the predicted probability of each person's time period fixed to the pre-period, averaged, vs the predicted probability each person's time period fixed to the post-period, averaged. All other independent variable values were left as is. These predictions were stratified by group, so we could obtain the difference in the probabilities between the time periods for each group. Lastly, we obtained the difference in these two change values, giving us the difference-in-differences value and 95% CIs.

Reference: Williams, R. Using the margins command to estimate and interpret adjusted predictions and marginal effects. *The Stata Journal* (2012) 12, Number 2, pp. 308–331

**eTable 1.** Parallel Trends Tests for Main Analysis

|                                             | Parallel trend |
|---------------------------------------------|----------------|
|                                             | p              |
| Annual A1c                                  | 0.746          |
| HbA1c poor control                          | 0.853          |
| Annual renal test (microalbumin)            | 0.943          |
| Hypertension control                        | 0.941          |
| High risk medication in older adults        | 0.950          |
| Timely mental health referral               | 0.070          |
| Primary Care Mental Health Integrated Visit | 0.969          |
| Hospitalization for ACSC                    | 0.664          |

**eTable 2.** Results from Difference-in-Differences Analysis of Outcomes Without Parallel Trends in the Preintervention Period, External Trainee Comparison Group

|                       | Patients of non CoEPCE clinician trainees (Comparison) |                      |                         |       | Patients of CoEPCE Trainees (Intervention) |                      |                         |       | Difference in Differences |        | Parallel trends |
|-----------------------|--------------------------------------------------------|----------------------|-------------------------|-------|--------------------------------------------|----------------------|-------------------------|-------|---------------------------|--------|-----------------|
|                       | 2008-2010                                              | 2011-2014            | Difference              | p     | 2008-2010                                  | 2011-2014            | Difference              | p     | Diff                      | p      | p               |
| # Primary Care Visits | 3.605 (3.332, 3.877)                                   | 3.546 (3.278, 3.813) | -0.059 (-0.101, -0.017) | 0.006 | 3.777 (3.492, 4.062)                       | 3.741 (3.458, 4.023) | -0.036 (-0.084, 0.012)  | 0.144 | 0.023 (-0.040, 0.086)     | 0.424  | 0.050           |
| ED Visit              | 0.401 (0.355, 0.447)                                   | 0.384 (0.339, 0.430) | -0.017 (-0.025, -0.009) | <0.01 | 0.405 (0.359, 0.452)                       | 0.351 (0.307, 0.395) | -0.054 (-0.063, -0.045) | <0.01 | -0.037 (-0.049, -0.025)   | <0.001 | 0.017           |
| # ED visits           | 0.928 (0.736, 1.081)                                   | 0.850 (0.689, 1.010) | -0.059 (-0.087, -0.031) | <0.01 | 0.898 (0.728, 1.068)                       | 0.747 (0.605, 0.888) | -0.151 (-0.190, -0.112) | <0.01 | -0.092 (-0.139, -0.045)   | <0.001 | 0.022           |
| Hospitalization       | 0.108 (0.092, 0.124)                                   | 0.102 (0.087, 0.117) | -0.006 (-0.011, -0.002) | 0.005 | 0.100 (0.085, 0.115)                       | 0.086 (0.073, 0.099) | -0.014 (-0.019, -0.009) | <0.01 | -0.008 (-0.015, -0.001)   | 0.007  | 0.047           |
| # Hospitalizations    | 0.208 (0.170, 0.247)                                   | 0.186 (0.152, 0.220) | -0.022 (-0.033, -0.011) | <0.01 | 0.185 (0.150, 0.219)                       | 0.155 (0.126, 0.184) | -0.030 (-0.040, -0.018) | <0.01 | -0.008 (-0.024, 0.008)    | 0.120  | 0.013           |

Results from logistic mixed models or negative binomial mixed models, with adjustment for age, gender, race/ethnicity, Elixhauser comorbidity score, and years of VA care.

**eTable 3.** Sensitivity Analysis 1, Changes in Quality of Care Measures Among Patients of CoEPCE Resident Clinicians and Patients of Attending Clinicians at CoEPCE Sites Before and After Initiative Launch

Predicted probabilities in comparison and COEPCE groups, pre- and post-intervention.

|                                             | Patients of attending physicians at CoEPCE sites (Comparison) |                       |                         |        | Patients of CoEPCE Trainees (Intervention) |                       |                         |        | Diff in diff            |        |
|---------------------------------------------|---------------------------------------------------------------|-----------------------|-------------------------|--------|--------------------------------------------|-----------------------|-------------------------|--------|-------------------------|--------|
|                                             | 2008-2010                                                     | 2011-2014             | Difference              | p      | 2008-2010                                  | 2011-2014             | Difference              | p      | Diff                    | p      |
| Annual A1c                                  | 0.955 (0.949, 0.961)                                          | 0.960 (0.954, 0.966)  | 0.005 (<0.001, 0.009)   | 0.033  | 0.953 (0.943, 0.962)                       | 0.959 (0.950, 0.968)  | 0.006 (-0.004, 0.017)   | 0.033  | 0.001 (-0.010, 0.013)   | 0.825  |
| HbA1c poor control                          | 0.208 (0.197, 0.219)                                          | 0.231 (0.219, 0.243)  | 0.023 (0.014, 0.032)    | <0.001 | 0.231 (0.213, 0.249)                       | 0.228 (0.210, 0.246)  | -0.003 (-0.025, 0.018)  | 0.759  | -0.027 (-0.050, -0.004) | 0.020  |
| Annual renal test (microalbumin)            | 0.798 (0.778, 0.819)                                          | 0.780 (0.758, 0.801)  | -0.019 (-0.027, -0.010) | <0.001 | 0.811 (0.787, 0.834)                       | 0.833 (0.811, 0.855)  | 0.022 (0.002, 0.043)    | 0.034  | 0.041 (0.019, 0.063)    | <0.001 |
| Hypertension control                        | 0.663 (0.632, 0.694)                                          | 0.639 (0.607, 0.671)  | -0.024 (-0.033, -0.014) | <0.001 | 0.628 (0.593, 0.663)                       | 0.610 (0.574, 0.646)  | -0.017 (-0.040, 0.005)  | 0.123  | 0.006 (-0.018, 0.030)   | 0.561  |
| High risk medication in older adults        | 0.317 (0.294, 0.340)                                          | 0.264 (0.243, 0.285)  | -0.053 (-0.059, -0.048) | <0.001 | 0.306 (0.281, 0.330)                       | 0.223 (0.203, 0.243)  | -0.083 (-0.096, -0.070) | <0.001 | -0.030 (-0.042, -0.016) | <0.001 |
| Timely mental health referral               | 0.187 (0.161, 0.214)                                          | 0.182 (0.156, 0.208)  | -0.005 (-0.008, -0.003) | <0.001 | 0.166 (0.141, 0.191)                       | 0.191 (0.163, 0.218)  | 0.025 (0.018, 0.031)    | <0.001 | 0.030 (0.023, 0.037)    | <0.001 |
| Primary Care Mental Health Integrated Visit | 0.020 (-0.004, 0.043)                                         | 0.019 (-0.004, 0.041) | -0.001 (-0.003, -0.001) | 0.151  | 0.013 (-0.003, 0.030)                      | 0.022 (-0.004, 0.048) | 0.009 (-0.001, 0.019)   | 0.078  | 0.010 (-0.001, 0.021)   | <0.001 |
| Hospitalization for ACSC                    | 0.023 (0.021, 0.026)                                          | 0.020 (0.180, 0.022)  | -0.003 (-0.004, -0.002) | <0.001 | 0.028 (0.025, 0.032)                       | 0.021 (0.019, 0.024)  | -0.007 (-0.010, -0.005) | <0.001 | -0.004 (-0.007, -0.001) | 0.008  |

**eTable 4.** Sensitivity Analysis 2, Quality of Care Measures Among Patients of CoEPCE Clinician Trainees and Patients of Non-CoEPCE Resident Clinicians at CoEPCE Sites After Initiative Launch (July 2011) at 3 CoEPCE Sites

At CoEPCE sites in Cleveland, West Haven, and Seattle, some resident clinicians participated in the CoEPCE and others did not. Predicted probabilities in comparison and COEPCE groups, post-intervention.

|                                             | Pts of non-CoEPCE trainees<br>Comparison | Pts of CoEPCE trainees<br>Intervention | Diff                   | p      |
|---------------------------------------------|------------------------------------------|----------------------------------------|------------------------|--------|
| Annual A1c                                  | 0.960 (0.948, 0.972)                     | 0.962 (0.954, 0.970)                   | 0.002 (-0.012, 0.016)  | 0.773  |
| HbA1c poor control                          | 0.255 (0.228, 0.282)                     | 0.241 (0.221, 0.261)                   | -0.014 (-0.434, 0.015) | 0.330  |
| Annual renal test (microalbumin)            | 0.822 (0.783, 0.860)                     | 0.859 (0.830, 0.887)                   | 0.037 (0.008, 0.066)   | 0.012  |
| Hypertension control                        | 0.604 (0.569, 0.638)                     | 0.603 (0.574, 0.631)                   | -0.001 (-0.033, 0.031) | 0.959  |
| High risk medication in older adults        | 0.254 (0.229, 0.280)                     | 0.251 (0.229, 0.274)                   | -0.003 (-0.022, 0.015) | 0.730  |
| Timely mental health referral               | 0.205 (0.179, 0.231)                     | 0.228 (0.201, 0.254)                   | 0.023 (0.012, 0.033)   | <0.001 |
| Primary Care Mental Health Integrated Visit | 0.022 (0.003, 0.042)                     | 0.026 (0.004, 0.048)                   | 0.004 (-0.002, 0.011)  | 0.223  |
| Hospitalization for ACSC                    | 0.027 (0.022, 0.031)                     | 0.025 (0.021, 0.029)                   | -0.002 (-0.006, 0.002) | 0.348  |

CoEPCE – Centers of Excellence in Primary Care Education, ED –emergency department, ACSC ambulatory care sensitive condition.

Results from logistic mixed models, with adjustment for age, gender, race/ethnicity, Elixhauser comorbidity score, and years of VA care.
